# Supplementary material for: Rod genesis driven by mafba in an nrl knockout zebrafish model with altered photoreceptor composition and progressive retinal degeneration
Source: PLoS Genet. 2022 Mar 4;18(3):e1009841. doi: 10.1371/journal.pgen.1009841 (PMC8926279; doi:10.1371/journal.pgen.1009841)
Supplement: S2 Dataset — (XLSX) [file pgen.1009841.s014.xlsx]

## Sheet: The top 100 DE genes
S2 Dataset. Functional categories of the top 100 differentially expressed genes between WT and nrl-KO retinas
Functional categories	gene_id	length	WT-R1.FPKM	WT-R2.FPKM	nrl-R1.FPKM	nrl-R2.FPKM	baseMean	log2FoldChange	lfcSE	stat	pvalue	padj	Regulation	KO	GO	Description
Inflammatory and immune response	mhc2dab	1428	62.26	60.51	0	0	430.128	-5.82317	0.254238	-22.9044	4.19823e-116	4.30843e-112	Down	K06752	biological_process:immune response(GO:0006955);biological_process:antigen processing and presentation of peptide or polysaccharide antigen via MHC class II(GO:0002504);cellular_component:integral component of membrane(GO:0016021);cellular_component:MHC class II protein complex(GO:0042613)	major histocompatibility complex class II DAB gene [Source:ZFIN;Acc:ZDB-GENE-980526-200]
	mhc2a	1590	75.85	64.63	0.71	0.73	552.954	-5.28043	0.219585	-24.0473	8.91205e-128	1.8292e-123	Down	K06752	biological_process:immune response(GO:0006955);biological_process:antigen processing and presentation of peptide or polysaccharide antigen via MHC class II(GO:0002504);cellular_component:integral component of membrane(GO:0016021);cellular_component:MHC class II protein complex(GO:0042613)	Novel vertebrate MHC class II alpha chain [Source:ZFIN;Acc:ZDB-GENE-030616-436]
	mhc1-like	3003	2.26	2.15	0	0	32.5129	-2.46917	0.30543	-8.08425	6.25465e-16	1.83395e-13	Down	K06751	_	major histocompatibility complex class I-related gene protein-like [Source:NCBI gene;Acc:108181672]
	mhc1-like	3825	1.45	1.12	0	0	24.0555	-2.08337	0.30594	-6.80974	9.77724e-12	1.53967e-09	Down	K06751	_	major histocompatibility complex class I-related gene protein-like
	ifi44a4	1471	3.08	6.33	0	0.07	34.5322	-2.16531	0.306143	-7.07288	1.51751e-12	2.80603e-10	Down	_	molecular_function:GTP binding(GO:0005525)	interferon-induced protein 44 [Source:NCBI gene;Acc:103909973]
	ifi44a3	1983	2.54	4.55	0	0	34.7939	-2.3259	0.306155	-7.59714	3.02748e-14	7.14129e-12	Down	_	molecular_function:GTP binding(GO:0005525)	interferon-induced protein 44, IFI44 [Source:ZFIN;Acc:ZDB-GENE-030131-9145]
	gvin1-like	3612	1.88	1.29	0	0.03	28.2151	-2.16633	0.306147	-7.07612	1.48252e-12	2.76624e-10	Down	_	_	interferon-induced very large GTPase 1-like [Source:ZFIN;Acc:ZDB-GENE-131119-50]
	gvin1-like	5786	3.09	0.89	0.12	0.08	58.8163	-1.92432	0.305802	-6.2927	3.11984e-10	3.92751e-08	Down	_	_	interferon-induced very large GTPase 1-like [Source:NCBI gene;Acc:101883914]
	si:ch211-214b16.4	5018	9.82	8.81	0	0	229.139	-5.01882	0.266913	-18.8032	7.11099e-79	2.43255e-75	Down	K12800	_	similar to NLRC3, NLRP12, NLRP3 [Source:ZFIN;Acc:ZDB-GENE-081105-53]
	si:ch211-181d7.3	8431	5.46	3.46	0	0	183.447	-4.49973	0.27957	-16.0952	2.7571e-58	7.0737e-55	Down	K12800	_	similar to NLRC3; NLRP12 [Source:ZFIN;Acc:ZDB-GENE-121214-30]
	si:ch211-181d7.1	7092	5.17	3.16	0	0	144.066	-4.17035	0.285069	-14.6293	1.82736e-48	4.16741e-45	Down	K12800	_	similar to NLRC3; NLRP12 [Source:ZFIN;Acc:ZDB-GENE-121214-14]
	CABZ01030017.2	3906	4.06	3.6	0	0.05	73.8106	-3.40098	0.290477	-11.7083	1.15612e-31	1.48309e-28	Down	K12800	_	similar to NLRC3; NLRP12
	BX664622.1	8012	1.61	1.47	0.01	0.01	60.9439	-3.15471	0.294428	-10.7147	8.68032e-27	7.12655e-24	Down	K12800	_	similar to NLRC3; NLRP12
	CABZ01049625.1	2779	4	2.43	0.04	0.03	44.0754	-2.5878	0.303252	-8.5335	1.41985e-17	5.49857e-15	Down	K12800	_	similar to NLRC3, NLRP3
	si:dkey-196n19.2	3682	1.59	1.32	0	0.03	26.4798	-2.13452	0.30616	-6.97192	3.12642e-12	5.53187e-10	Down	K12800	_	similar to NLRP12 [Source:ZFIN;Acc:ZDB-GENE-081104-8]
	si:dkey-237g15.2	4187	3.29	2.52	0.35	0.35	66.9577	-2.09399	0.275247	-7.60766	2.79114e-14	6.6614e-12	Down	K12800	_	similar to NLRC3 [Source:ZFIN;Acc:ZDB-GENE-060503-157]
	zgc:172122	1610	2.3	2.36	9.62	7.56	89.2899	1.51807	0.250941	6.04953	1.45269e-09	1.59446e-07	Ups	K06556	cellular_component:integral component of membrane(GO:0016021)	Orthologous to human CD200, OX-2 membrane glycoprotein [Source:ZFIN;Acc:ZDB-GENE-080208-1]
	si:dkey-165o8.2	3874	0.19	0.05	1.17	1.92	33.0023	1.79065	0.305576	5.85991	4.63118e-09	4.54809e-07	Ups	K12800	_	similar to NLRP12, NLRC3 [Source:ZFIN;Acc:ZDB-GENE-131122-2]
	nfil3-5	4331	16.58	19.71	74.27	58.75	1862.51	1.80067	0.154047	11.6891	1.44944e-31	1.74999e-28	Ups	K09059	molecular_function:sequence-specific DNA binding transcription factor activity(GO:0003700);molecular_function:sequence-specific DNA binding(GO:0043565);biological_process:regulation of transcription, DNA-templated(GO:0006355)	nuclear factor, interleukin 3 regulated, member 5 [Source:ZFIN;Acc:ZDB-GENE-030131-7677]
	si:dkey-172k15.6	5775	0.02	0.02	1.09	1.07	32.4934	2.36904	0.304744	7.77388	7.61164e-15	1.97758e-12	Ups	K12800	_	similar to NLRP3, NLRP12 [Source:ZFIN;Acc:ZDB-GENE-121214-9]
	si:ch211-266c8.1	15239	0.18	0.34	3.33	2.96	264.916	3.02802	0.227132	13.3315	1.51779e-40	3.11527e-37	Ups	K12800	_	NLRP12-like [Source:ZFIN;Acc:ZDB-GENE-070424-173]
	si:dkey-238k10.2	4710	0.11	0.08	4.23	4.45	107.088	3.60225	0.272227	13.2325	5.69445e-40	1.06253e-36	Ups	K12800	_	similar to NLRP12, NLRP3 [Source:ZFIN;Acc:ZDB-GENE-070705-400]
	si:dkey-238k10.1	1006	0	0	48.67	45.5	242.887	5.15006	0.265104	19.4265	4.60371e-84	2.36228e-80	Ups	K12800	_	similar to NLRP12, NLRP3, TRIM39, stonustoxin subunit alpha-like [Source:ZFIN;Acc:ZDB-GENE-070705-399]
Signal transduction	aipl1	2784	77.66	73.55	11.91	12.73	1208.44	-2.43874	0.125783	-19.3884	9.67183e-84	3.97029e-80	Down	K17767	_	aryl hydrocarbon receptor interacting protein-like 1 [Source:ZFIN;Acc:ZDB-GENE-131121-577]
	fgf1b	1844	7.65	4.79	0.11	0.31	57.9885	-2.59103	0.296381	-8.74224	2.28527e-18	9.38102e-16	Down	K18496	molecular_function:growth factor activity(GO:0008083)	fibroblast growth factor 1b [Source:ZFIN;Acc:ZDB-GENE-071004-7]
	CABZ01028770.1	501	12.94	6.83	0	0	24.1152	-1.95817	0.304987	-6.4205	1.35825e-10	1.81026e-08	Down	K04392	molecular_function:GTP binding(GO:0005525);cellular_component:intracellular(GO:0005622);cellular_component:membrane(GO:0016020);biological_process:small GTPase mediated signal transduction(GO:0007264)	ras-related C3 botulinum toxin substrate 1-like [Source:NCBI gene;Acc:100537765]
	rxfp2a	2988	2.62	3.09	9.16	9.27	183.209	1.52584	0.204584	7.45827	8.76647e-14	1.89402e-11	Ups	K04307	cellular_component:integral component of membrane(GO:0016021);biological_process:G-protein coupled receptor signaling pathway(GO:0007186);molecular_function:G-protein coupled receptor activity(GO:0004930)	relaxin family peptide receptor 2a [Source:ZFIN;Acc:ZDB-GENE-040426-1225]
	tns2b	7794	1.58	1.13	4.04	4.74	227.581	1.53517	0.205187	7.48178	7.33214e-14	1.60098e-11	Ups	K18080	_	tensin 2b [Source:ZFIN;Acc:ZDB-GENE-101001-5]
	grid2ipb	4318	6.74	5.66	21.98	19.7	592.543	1.69791	0.150224	11.3025	1.27547e-29	1.30895e-26	Ups	_	biological_process:actin cytoskeleton organization(GO:0030036);molecular_function:actin binding(GO:0003779);cellular_component:cell junction(GO:0030054);cellular_component:postsynaptic membrane(GO:0045211);cellular_component:plasma membrane(GO:0005886)	glutamate receptor, ionotropic, delta 2 (Grid2) interacting protein, b [Source:ZFIN;Acc:ZDB-GENE-040724-161]
	plcb2	3490	4.63	4	14.53	17.57	361.429	1.77353	0.18018	9.84313	7.33919e-23	4.7074e-20	Ups	K05858	_	plcb2, phospholipase C beta 2. Orthologous to human PLCB2 (phospholipase C beta 2)
	tmtops2a	2560	6.07	7.13	25.46	36.78	492.494	2.01389	0.201399	9.9995	1.53163e-23	1.04789e-20	Ups	K04256	_	teleost multiple tissue opsin 2a [Source:ZFIN;Acc:ZDB-GENE-130129-3]
	ahrrb	1780	2.02	2.03	12.94	11.34	128.473	2.17028	0.231534	9.3735	7.0169e-21	4.00061e-18	Ups	K09094	biological_process:regulation of transcription from RNA polymerase II promoter(GO:0006357);molecular_function:signal transducer activity(GO:0004871);cellular_component:transcription factor complex(GO:0005667);molecular_function:DNA binding(GO:0003677);biological_process:response to chemical(GO:0042221);molecular_function:protein dimerization activity(GO:0046983);molecular_function:sequence-specif…	aryl-hydrocarbon receptor repressor b [Source:ZFIN;Acc:ZDB-GENE-051018-2]
	nme2a	978	0.11	0	39.92	35.64	189.688	4.76364	0.269213	17.6947	4.60728e-70	1.35092e-66	Ups	K00940	_	NME/NM23 nucleoside diphosphate kinase 2a, nme2a
Metabolism	ggact.1	1790	3.39	4.25	0	0	33.6634	-2.46456	0.305553	-8.06587	7.27145e-16	2.10206e-13	Down	K19761	molecular_function:gamma-glutamylcyclotransferase activity(GO:0003839);biological_process:cellular modified amino acid catabolic process(GO:0042219)	gamma-glutamylamine cyclotransferase, tandem duplicate 1 [Source:ZFIN;Acc:ZDB-GENE-061103-94]
	aldoca	2174	2.84	3.8	0	0.04	35.8351	-2.44544	0.305079	-8.01577	1.0945e-15	3.07736e-13	Down	K01623	_	aldolase C, fructose-bisphosphate, a [Source:ZFIN;Acc:ZDB-GENE-050706-128]
	dhrs7ca	1808	3.07	4	0.06	0	31.7382	-2.30793	0.305765	-7.54807	4.41772e-14	1.00748e-11	Down	K11167	cellular_component:extracellular region(GO:0005576);molecular_function:oxidoreductase activity(GO:0016491);biological_process:oxidation-reduction process(GO:0055114);molecular_function:nucleotide binding(GO:0000166)	dehydrogenase/reductase (SDR family) member 7Ca [Source:ZFIN;Acc:ZDB-GENE-050320-114]
	ggact.2	2240	2.25	2.12	0	0	24.0223	-2.10307	0.306024	-6.87224	6.3203e-12	1.02956e-09	Down	K19761	molecular_function:gamma-glutamylcyclotransferase activity(GO:0003839);biological_process:cellular modified amino acid catabolic process(GO:0042219)	gamma-glutamylamine cyclotransferase, tandem duplicate 2 [Source:ZFIN;Acc:ZDB-GENE-040912-8]
	pycr1a	2726	4.91	6.42	0.45	0.99	86.175	-2.00949	0.277851	-7.23225	4.75062e-13	9.55946e-11	Down	K00286	molecular_function:pyrroline-5-carboxylate reductase activity(GO:0004735);biological_process:proline biosynthetic process(GO:0006561);biological_process:oxidation-reduction process(GO:0055114);molecular_function:nucleotide binding(GO:0000166)	pyrroline-5-carboxylate reductase 1a [Source:ZFIN;Acc:ZDB-GENE-040426-1675]
	ugt5c2	1872	0.11	0.2	1.71	2.27	20.5865	1.52525	0.305874	4.98653	6.14732e-07	3.67854e-05	Ups	K00699	molecular_function:transferase activity, transferring hexosyl groups(GO:0016758);biological_process:metabolic process(GO:0008152)	UDP glucuronosyltransferase 5 family, polypeptide C2 [Source:ZFIN;Acc:ZDB-GENE-060825-206]
	cyp2p7	2194	0.14	0.43	2.87	2.33	32.388	1.65876	0.304114	5.45442	4.91323e-08	3.77693e-06	Ups	K07418	molecular_function:heme binding(GO:0020037);molecular_function:oxidoreductase activity, acting on paired donors, with incorporation or reduction of molecular oxygen, reduced flavin or flavoprotein as one donor, and incorporation of one atom of oxygen(GO:0016712);molecular_function:iron ion binding(GO:0005506);molecular_function:electron carrier activity(GO:0009055);biological_process:oxidation-re…	cytochrome P450, family 2, subfamily P, polypeptide 7 [Source:ZFIN;Acc:ZDB-GENE-041001-155]
	ppifa	1032	4.19	3.78	25.32	20.4	141.033	2.1343	0.22931	9.3075	1.30875e-20	6.88773e-18	Ups	K09565	molecular_function:peptidyl-prolyl cis-trans isomerase activity(GO:0003755);biological_process:protein folding(GO:0006457)	peptidylprolyl isomerase Fa [Source:ZFIN;Acc:ZDB-GENE-040912-52]
	hsd20b2	2936	1.16	1.1	5.95	10.62	141.379	2.19353	0.263146	8.3358	7.6978e-17	2.67792e-14	Ups	K10251	cellular_component:endoplasmic reticulum(GO:0005783);biological_process:metabolic process(GO:0008152);molecular_function:androstan-3-alpha,17-beta-diol dehydrogenase activity(GO:0047044);molecular_function:nucleotide binding(GO:0000166)	hydroxysteroid (20-beta) dehydrogenase 2 [Source:ZFIN;Acc:ZDB-GENE-030804-21]
	cyp2p9	2328	0.22	0.53	4.79	4.89	62.1847	2.38531	0.285828	8.34527	7.10534e-17	2.51443e-14	Ups	K07418	molecular_function:heme binding(GO:0020037);molecular_function:oxidoreductase activity, acting on paired donors, with incorporation or reduction of molecular oxygen, reduced flavin or flavoprotein as one donor, and incorporation of one atom of oxygen(GO:0016712);molecular_function:iron ion binding(GO:0005506);molecular_function:electron carrier activity(GO:0009055);biological_process:oxidation-re…	cytochrome P450, family 2, subfamily P, polypeptide 9 [Source:ZFIN;Acc:ZDB-GENE-040120-2]
Cell adhesion and extracellular matrix	epcam	1476	34.44	29.5	1.75	3.6	251.469	-2.8652	0.231639	-12.3692	3.83489e-35	5.24741e-32	Down	K06737	biological_process:epiboly involved in gastrulation with mouth forming second(GO:0055113);cellular_component:basolateral plasma membrane(GO:0016323);biological_process:single organismal cell-cell adhesion(GO:0016337);cellular_component:perinuclear region of cytoplasm(GO:0048471)	epithelial cell adhesion molecule [Source:ZFIN;Acc:ZDB-GENE-040426-2209]
	serpina10a	2750	103.65	108.75	14.57	13.38	1631.54	-2.73552	0.126432	-21.6363	8.17885e-104	5.5957e-100	Down	K15426	_	serpin peptidase inhibitor, clade A (alpha-1 antiproteinase, antitrypsin), member 10a. Predicted to have serine-type endopeptidase inhibitor activity. Predicted to be involved in negative regulation of endopeptidase activity. Predicted to localize to extracellular space. Human ortholog(s) of this gene implicated in thrombophilia. Orthologous to human SERPINA10 (serpin family A member 10). [Source…
	f13a1a.1	3541	1.92	3.36	0.2	0.05	48.4931	-2.16063	0.302922	-7.13265	9.84563e-13	1.90643e-10	Down	K03917	biological_process:peptide cross-linking(GO:0018149);molecular_function:protein-glutamine gamma-glutamyltransferase activity(GO:0003810)	coagulation factor XIII, A1 polypeptide a, tandem duplicate 1 [Source:ZFIN;Acc:ZDB-GENE-060929-1250]
	vwa10.2	3741	10.01	6.91	1.85	0.95	181.479	-1.98454	0.249356	-7.95866	1.73916e-15	4.82381e-13	Down	K03900	_	von Willebrand factor A domain containing 10, tandem duplicate 2 [Source:ZFIN;Acc:ZDB-GENE-090313-295]
	arhgef18a	4244	2.64	1.88	7.62	6.85	204.306	1.52007	0.204937	7.41726	1.1957e-13	2.53008e-11	Ups	K21066	molecular_function:Rho guanyl-nucleotide exchange factor activity(GO:0005089);molecular_function:phospholipid binding(GO:0005543);cellular_component:intracellular(GO:0005622);biological_process:regulation of Rho protein signal transduction(GO:0035023)	rho/rac guanine nucleotide exchange factor (GEF) 18a [Source:ZFIN;Acc:ZDB-GENE-040516-14]
	itgb4	9247	8.31	7.33	19.86	28.06	1492.9	1.54318	0.169251	9.11765	7.67731e-20	3.75183e-17	Ups	K06525	biological_process:cell motility(GO:0048870);biological_process:cell-matrix adhesion(GO:0007160);molecular_function:receptor activity(GO:0004872);biological_process:integrin-mediated signaling pathway(GO:0007229);biological_process:hemidesmosome assembly(GO:0031581);biological_process:multicellular organismal development(GO:0007275);cellular_component:integrin complex(GO:0008305)	integrin, beta 4 [Source:ZFIN;Acc:ZDB-GENE-030131-7209]
	CABZ01083546.1	2216	0.56	0.82	3.5	3.92	49.6838	1.64739	0.286075	5.75857	8.48279e-09	7.5372e-07	Ups	K06244	_	LAMB3, laminin subunit beta 3
	pkp1b	2833	3.74	4.66	17.68	23.42	357.665	2.05301	0.202607	10.133	3.9453e-24	2.89205e-21	Ups	K10387	_	plakophilin 1b [Source:ZFIN;Acc:ZDB-GENE-030131-417]
Transport	slc12a10.3	4203	3.57	6.29	0.44	0.34	110.933	-2.46202	0.277893	-8.8596	8.0305e-19	3.58723e-16	Down	K14426	molecular_function:cation:chloride symporter activity(GO:0015377);cellular_component:integral component of membrane(GO:0016021);biological_process:ion transport(GO:0006811);biological_process:transmembrane transport(GO:0055085)	slc12a10.3 solute carrier family 12 (sodium/potassium/chloride transporters), member 10, tandem duplicate 3 [Source:ZFIN;Acc:ZDB-GENE-060503-518]
	dnah6	12816	1.04	0.89	0.14	0.1	68.1685	-2.09705	0.273165	-7.67686	1.63032e-14	3.93675e-12	Down	K10408	_	dynein, axonemal, heavy chain 6 [Source:ZFIN;Acc:ZDB-GENE-030616-623]
	si:ch73-252p3.1	8078	5.66	3.86	1.14	0.86	229.089	-1.84702	0.219681	-8.40773	4.18028e-17	1.50527e-14	Down	K23949	_	SAMD9, sterile alpha motif domain-containing protein 9 [Source:ZFIN;Acc:ZDB-GENE-110411-85]
	slc2a6	4613	0.2	0.25	1.32	1.7	40.8226	1.70583	0.295143	5.77968	7.48441e-09	6.85793e-07	Ups	K08144	_	solute carrier family 2 (facilitated glucose transporter), member 6 [Source:ZFIN;Acc:ZDB-GENE-081104-301]
	slc16a10	2389	1.55	1.35	5.66	7.48	97.6298	1.74561	0.252411	6.91574	4.65437e-12	7.76675e-10	Ups	K08187	cellular_component:integral component of membrane(GO:0016021);cellular_component:plasma membrane(GO:0005886);biological_process:transmembrane transport(GO:0055085)	solute carrier family 16 (aromatic amino acid transporter), member 10 [Source:ZFIN;Acc:ZDB-GENE-040724-214]
	slc25a23a	6252	1.45	2.14	6.43	7.83	284.248	1.7487	0.214781	8.14178	3.89523e-16	1.17573e-13	Ups	K14684	_	solute carrier family 25 (mitochondrial carrier; phosphate carrier), member 23a [Source:ZFIN;Acc:ZDB-GENE-121214-154]
	kcnj5-like	2176	0.66	1.49	13.2	15	169.044	2.90606	0.249726	11.637	2.67227e-31	2.88676e-28	Ups	K04999	_	KCNJ5-like, G protein-activated inward rectifier potassium channel 4-like [Source:ZFIN;Acc:ZDB-GENE-131127-162]
Cell protection and death	bnip4	1401	5.07	5.5	0.07	0.07	36.8751	-2.48316	0.303563	-8.18004	2.83751e-16	8.82423e-14	Down	K15464	_	BCL2 interacting protein 4 [Source:ZFIN;Acc:ZDB-GENE-051113-212]
	parp14-like	12499	1.3	0.87	0.15	0.19	77.1196	-1.88614	0.27139	-6.9499	3.6555e-12	6.25242e-10	Down	K15261	_	parp14-like, poly [ADP-ribose] polymerase 14-like [Source:ZFIN;Acc:ZDB-GENE-160114-75]
	gsta.2	1053	5.28	6.95	0.39	0.55	34.2652	-1.88521	0.302652	-6.22896	4.6955e-10	5.66913e-08	Down	K00799	biological_process:metabolic process(GO:0008152);molecular_function:glutathione transferase activity(GO:0004364)	glutathione S-transferase, alpha tandem duplicate 2 [Source:ZFIN;Acc:ZDB-GENE-070822-30]
	ern1	8186	5.97	3.73	17.63	14.32	863.759	1.60416	0.186863	8.58472	9.10584e-18	3.59418e-15	Ups	K08852	biological_process:mRNA processing(GO:0006397);biological_process:protein phosphorylation(GO:0006468);molecular_function:ATP binding(GO:0005524);molecular_function:ribonuclease activity(GO:0004540);molecular_function:protein serine/threonine kinase activity(GO:0004674)	endoplasmic reticulum to nucleus signaling 1 [Source:ZFIN;Acc:ZDB-GENE-050522-431]
	cdr2b	2211	2.51	3.57	12.33	11.92	170.682	1.73046	0.220975	7.83105	4.83812e-15	1.28964e-12	Ups	_	_	cerebellar degeneration related protein 2-like [Source:ZFIN;Acc:ZDB-GENE-121214-325]
	capn2l	2597	0.04	0.07	3.14	6.69	66.4715	2.8088	0.302126	9.29679	1.44751e-20	7.42755e-18	Ups	K03853	cellular_component:intracellular(GO:0005622);biological_process:proteolysis(GO:0006508);molecular_function:calcium-dependent cysteine-type endopeptidase activity(GO:0004198);molecular_function:calcium ion binding(GO:0005509)	calpain 2, (m/II) large subunit, like [Source:ZFIN;Acc:ZDB-GENE-050417-341]
Zinc finger protein	si:ch211-120c15.3	2267	4.22	2.98	0	0	39.873	-2.66423	0.30426	-8.75642	2.01556e-18	8.61863e-16	Down	K09228	_	gastrula zinc finger protein XlCGF8.2DB-like [Source:ZFIN;Acc:ZDB-GENE-110913-99]
	znf1124	4381	4.11	3.47	0.71	0.64	96.4711	-1.90875	0.24757	-7.70994	1.25874e-14	3.1507e-12	Down	K09228	_	zinc finger protein 1124 [Source:ZFIN;Acc:ZDB-GENE-071004-105]
	CABZ01002768.1	2206	2.8	1.98	0.14	0.04	26.8078	-1.90797	0.306066	-6.23385	4.55115e-10	5.52736e-08	Down	K09228	_	gastrula zinc finger protein XlCGF8.2DB
	znf988	1256	6.55	5.9	0.9	0.54	42.9866	-1.85605	0.293762	-6.31821	2.64608e-10	3.41577e-08	Down	K09228	molecular_function:zinc ion binding(GO:0008270);molecular_function:nucleic acid binding(GO:0003676);cellular_component:intracellular(GO:0005622)	zinc finger protein 988 [Source:ZFIN;Acc:ZDB-GENE-110914-28]
	znf977	1914	0	0	10.52	6.21	81.9107	3.46103	0.296354	11.6787	1.63801e-31	1.86779e-28	Ups	K09228	_	zinc finger protein 977 [Source:ZFIN;Acc:ZDB-GENE-110913-138]
Protein degradation	si:dkey-18p12.4	1738	6.87	3.28	0	0	42.8979	-2.52038	0.305713	-8.24427	1.6617e-16	5.41371e-14	Down	_	_	SPRY_PRY_C-I_1 domain-containing protein. Predicted to have ubiquitin protein ligase activity. Predicted to be involved in protein ubiquitination. Predicted to localize to cytoplasm. Orthologous to human RNF39 (ring finger protein 39) [Source:ZFIN;Acc:ZDB-GENE-070912-408]
	btr32	2911	2.47	1.83	0	0	30.6245	-2.35839	0.305964	-7.70809	1.27716e-14	3.15828e-12	Down	K12015	molecular_function:zinc ion binding(GO:0008270);cellular_component:intracellular(GO:0005622)	bloodthirsty-related gene family, member 32. Predicted to have ubiquitin-protein transferase activity and zinc ion binding activity. Predicted to be involved in protein ubiquitination. Orthologous to several human genes including TRIM21 (tripartite motif containing 21). [Source:ZFIN;Acc:ZDB-GENE-060421-3827]
	rbbp6-like	507	15.22	19.69	64.99	95.61	252.824	1.88654	0.226684	8.32233	8.62514e-17	2.90215e-14	Ups	K10624	cellular_component:nucleus(GO:0005634);molecular_function:zinc ion binding(GO:0008270)	E3 ubiquitin-protein ligase, Retinoblastoma Binding Protein 6, RBBP6
	TRIM62	1198	0.17	0.08	7.59	10.48	56.3308	2.93166	0.29776	9.8457	7.1537e-23	4.7074e-20	Ups	K12030	molecular_function:zinc ion binding(GO:0008270);cellular_component:intracellular(GO:0005622)	tripartite motif containing 62. Predicted to have ubiquitin protein ligase activity. Predicted to be involved in several processes, including positive regulation of I-kappaB kinase/NF-kappaB signaling; positive regulation of NF-kappaB transcription factor activity; and protein ubiquitination. Predicted to localize to cytoplasm. Orthologous to human TRIM62 (tripartite motif containing 62). [Source…
Cell cycle regulation	nek5-like	5644	1.11	1.3	0	0	33.4373	-2.47728	0.305444	-8.11043	5.04402e-16	1.50041e-13	Down	K08857	_	serine/threonine-protein kinase Nek5 [Source:ZFIN;Acc:ZDB-GENE-040724-148]
	cdk10	2108	5.17	5.82	14.6	27.57	285.702	1.60154	0.244713	6.54456	5.96711e-11	8.27534e-09	Ups	K02449	biological_process:protein phosphorylation(GO:0006468);molecular_function:ATP binding(GO:0005524);molecular_function:protein serine/threonine kinase activity(GO:0004674)	cyclin-dependent kinase 10 [Source:ZFIN;Acc:ZDB-GENE-050417-94]
	ypel5	1132	4.55	5.71	16.61	22.52	142.35	1.61737	0.237968	6.79659	1.07126e-11	1.6532e-09	Ups	K23339	_	yippee-like 5 [Source:ZFIN;Acc:ZDB-GENE-040426-1220]
Spliceosomes	dhx40	7465	5.14	4.23	1.04	0.96	209.409	-1.89554	0.200727	-9.44341	3.60838e-21	2.11606e-18	Down	K18711	_	DEAH (Asp-Glu-Ala-His) box polypeptide 40 [Source:ZFIN;Acc:ZDB-GENE-080507-1]
	phf5a	1103	0.37	0.43	4.21	4.46	26.7406	1.71321	0.304869	5.61949	1.91522e-08	1.61106e-06	Ups	K12834	cellular_component:nuclear matrix(GO:0016363);cellular_component:U2 snRNP(GO:0005686);biological_process:mRNA splicing, via spliceosome(GO:0000398);cellular_component:nuclear speck(GO:0016607);molecular_function:DNA binding(GO:0003677);molecular_function:sequence-specific DNA binding transcription factor activity(GO:0003700);biological_process:positive regulation of transcription, DNA-templated(G…	PHD finger protein 5A. Predicted to be involved in mRNA splicing, via spliceosome. Predicted to localize to U12-type spliceosomal complex; U2 snRNP; and precatalytic spliceosome. Orthologous to human PHF5A (PHD finger protein 5A). [Source:ZFIN;Acc:ZDB-GENE-021219-3]
DNA repair	mre11a	5935	44.94	43.17	7.92	11.03	1571.66	-1.99054	0.160111	-12.4323	1.74609e-35	2.5599e-32	Down	K10865	molecular_function:exonuclease activity(GO:0004527);molecular_function:endonuclease activity(GO:0004519);molecular_function:manganese ion binding(GO:0030145);biological_process:meiotic nuclear division(GO:0007126);biological_process:double-strand break repair(GO:0006302);cellular_component:nucleus(GO:0005634)	MRE11 homolog A, double strand break repair nuclease [Source:ZFIN;Acc:ZDB-GENE-040426-2638]
LncRNA	CU457778.3	8657	4.46	2.69	0.26	0.25	162.168	-2.8422	0.254496	-11.1679	5.85163e-29	5.45931e-26	Down	K12800	_	LncRNA,SnRNA
	FP074902.2	1224	4.71	3.81	0	0	25.505	-2.16036	0.306135	-7.05689	1.70271e-12	3.06562e-10	Down	_	_	lncRNA [Source:NCBI gene;Acc:100538042]
	CABZ01066320.1	3087	3.8	3.82	12.82	13.23	263.988	1.6597	0.180182	9.21124	3.22377e-20	1.61385e-17	Ups	_	_	lncRNA
	BX957252.3	2949	0	0.06	1.37	1.28	20.4631	1.78151	0.305339	5.83454	5.39396e-09	5.1977e-07	Ups	_	_	lncRNA
	AL627088.1	435	35.72	31.69	121.35	133.18	355.964	1.81413	0.170613	10.633	2.09169e-26	1.65123e-23	Ups	_	_	lncRNA
	CR848791.2	1419	0.22	0.33	6.33	4.22	40.2615	2.20634	0.301494	7.31805	2.51605e-13	5.11307e-11	Ups	_	_	lncRNA
	CR931813.2	1418	0.94	0.54	7.21	9.26	65.0982	2.33175	0.283301	8.23065	1.862e-16	5.97149e-14	Ups	_	_	lncRNA
	CR753876.1	1236	0.75	1.08	13.62	14.61	95.0933	2.8711	0.265109	10.8299	2.48509e-27	2.12527e-24	Ups	_	_	lncRNA
	BX957297.2	568	0	0.67	24.01	20.06	65.0947	3.10885	0.292854	10.6157	2.51949e-26	1.91528e-23	Ups	_	_	lncRNA
Uncertain	CU457778.1	3336	3.58	4.02	0	0	62.2867	-3.28378	0.296649	-11.0696	1.76198e-28	1.57238e-25	Down	_	_	uncharacterized LOC100535115 [Source:NCBI gene;Acc:100535115]
	si:ch211-63p21.1	12562	32.6	47.36	4.49	2.86	2713.29	-2.24271	0.287192	-7.80908	5.76061e-15	1.51585e-12	Down	_	_	uncharacterized protein [Source:ZFIN;Acc:ZDB-GENE-141216-443]
	vmo1a	1414	6.11	4.44	0.37	0.34	39.0243	-2.07374	0.299801	-6.91706	4.61118e-12	7.75775e-10	Down	_	_	vitelline membrane outer layer 1 homolog a [Source:ZFIN;Acc:ZDB-GENE-131121-600]
	si:ch211-214b16.2	853	5.19	5.46	0	0	22.307	-2.01232	0.305641	-6.58393	4.58173e-11	6.48552e-09	Down	_	_	stonustoxin subunit beta-like [Source:ZFIN;Acc:ZDB-GENE-141212-1]
	si:dkey-253d23.4	4679	2.79	1.71	0.15	0.31	56.9369	-1.96067	0.293032	-6.69099	2.21665e-11	3.27315e-09	Down	K06511	_	similar to SLAM family member 5 [Source:ZFIN;Acc:ZDB-GENE-050208-730]
	cpne8-like	6307	1.52	0.98	4.26	4.1	173.667	1.54048	0.218628	7.04612	1.8397e-12	3.28346e-10	Ups	_	_	CPNE8, copine-8 [Source:NCBI gene;Acc:101886030]
	si:ch73-366i20.1	2746	0.22	0.21	1.84	1.9	29.2715	1.68021	0.302994	5.54537	2.93339e-08	2.37038e-06	Ups	_	_	uncharacterized protein [Source:ZFIN;Acc:ZDB-GENE-070912-338]
	zgc:171497	2241	0	0	1.8	1.42	18.4834	1.81254	0.303566	5.97083	2.36045e-09	2.44688e-07	Ups	_	_	Uncharacterized protein;Ig domain-containing protein [Source:ZFIN;Acc:ZDB-GENE-080220-58]
	CU681841.1	5625	2.96	3.87	12.19	15.91	500.704	1.85781	0.195095	9.5226	1.68892e-21	1.01956e-18	Ups	_	_	Uncharacterized protein;Ig domain-containing protein
	CABZ01050238.1	189	7.08	3.52	80.89	37.81	62.2003	2.03091	0.298737	6.7983	1.0586e-11	1.64604e-09	Ups	_	_	similar to calcyphosin-like protein
	ovch1	2874	0.07	0.3	3.67	2.62	48.9094	2.24865	0.29907	7.51883	5.52691e-14	1.23304e-11	Ups	K09641	biological_process:proteolysis(GO:0006508);molecular_function:serine-type endopeptidase activity(GO:0004252)	ovch1, ovochymase-1 precursor [Source:ZFIN;Acc:ZDB-GENE-040426-834]
	si:ch211-57b15.2	1317	0	0	4.31	6.82	37.6889	2.54297	0.305464	8.32496	8.43598e-17	2.88581e-14	Ups	_	_	uncharacterized protein [Source:ZFIN;Acc:ZDB-GENE-141219-31]
